# Supplementary material
Source: publisher figshare collection journal article supplement (https://gsajournals.figshare.com/ndownloader/files/25300346)
Supplement: Supplementary file 1 [file 25300346]

| **REAGENT TABLE** |  |  |  |
| --- | --- | --- | --- |
|  |  |  |  |
| **REAGENT or RESOURCE** | **SOURCE** | **IDENTIFIER** | |
|  | | | |
| **Antibodies** | | | |
| Mouse hybridoma P1a+P1b (anti-NimC1) | Kurucz *et al.* 2007 | N/A | |
| Rabbit Cleaved Caspase-3 (Asp175) | Cell Signaling | RRID:AB_2341188 | |
| Alexa Fluor 555 Goat anti-Rabbit IgG | Molecular Probes | RRID:AB_141761 | |
| Alexa Fluor 555 Goat anti-Mouse | Invitrogen | RRID: AB_2535844 | |
| VectaShield Antifade | Vector Laboratories | RRID: AB_2336789 | |
| SlowFade Gold Antifade | Molecular Probes | S36937 | |
| DAPI | Molecular Probes | D1306 | |
| Hoechst 33258 | Sigma | B2261 | |
|  |  |  | |
| **Strains** | | | |
| *D. melanogaster; ywhsFlp1.22* | Struhl and Basler, 1993 | FBti0000785 | |
| *D. melanogaster; UAS-GFP-nls* | BDSC | FBti0012493 | |
| *D. melanogaster; tub>myc, y+>Gal4* | de la Cova et al, 2004 | N/A | |
| *D. melanogaster; act>CD2, y+>Gal4* | BDSC | RRID:BDSC-4779 | |
| *D. melanogaster; egr1* | Igaki et al 2002 | FBal0147164 | |
| *D. melanogaster; egr3* | Igaki et al 2002 | FBal0147163 | |
| *D. melanogaster; egrRegg1* | Igaki et al 2002 | FBal0265753 | |
| *D. melanogaster; egr31* | H. Kanda, M. Miura | N/A | |
| *D. melanogaster; yw hsflp;; UAS-Myc42* | BDSC | FBal0093088 | |
| *D. melanogaster; w; HmlΔ-DsRednls* | BDSC | FBal0359808 | |
| *D. melanogaster; OreR* | BDSC | RRID:BDSC-4269 | |
|  |  |  | |
| **Oligonucleotides** | | | |
| *P1utan600fw* | AACTGGATCGTCTAACAAGT | Honti et al 2013 | |
| *P1utan300rev* | GGATTGATTAACCACACAGA | Honti et al 2013 | |
| *P11189fw* | AAGGAATGTGGACACCATAG | Honti et al 2013 | |
| *P11189rev* | CGCAGGAGCCTACGATAATC | Honti et al 2013 | |
| *Egr_F1* | TCACCTCCTTTTGGAACTCG | This paper |  |
| *Egr_R3* | TCACCTCCTTTTGGAACTCG | This paper | |
| *Nimrod_del_F1* | CCGGGCTACGTAATGAGAAA | This paper | |
| *Nimrod_del_R1* | CAATTTGAGTGCGGAACCTC | This paper | |
|  |  |  | |
